# Supplementary material
Source: Springer Nature journal article supplement (https://www.springermedizin.de/resource/supplementary/13075_2013_4151_MOESM1_ESM.pdf/9696178)
Supplement: MOESM1 [file 9696178]

Die nächsten Fragen beziehen sich auf den **Zeitraum zwischen der letzten regulären und der heutigen Visite** in unserer Rheumaambulanz

17. STATIONÄRE KRANKENHAUSAUFENTHALTE (mindestens 1 Nacht)

**Wurden Sie seit Ihrer letzten Visite aufgrund Ihrer chronischen Polyarthrits stationär in einem Krankenhaus behandelt?**

- JA  NEIN

Wenn JA, wie häufig: \_\_\_\_mal

wie viele Tage insgesamt: \_\_\_\_Tage

- Grund des Aufenthalts:  Schub der chronischen Polyarthrits  
 Gelenksoperation  
 Medikamentenunverträglichkeit  
 Sonstige \_\_\_\_\_

18. TAGESKLINIK (Ohne Nächtigung im Krankenhaus)

**Wurden Sie seit Ihrer letzten Visite aufgrund Ihrer chronischen Polyarthrits stationär behandelt ohne im Krankenhaus zu übernachten („Tagesstation“)?**

- JA  NEIN

Wenn JA:

Wie häufig: \_\_\_\_\_mal

Aus welchem Grund? \_\_\_\_\_

19. UNTERSUCHUNGEN

**Wurden bei Ihnen aufgrund Ihrer chronischen Polyarthrits seit der letzten Visite spezielle Untersuchungen durchgeführt?**

- JA  NEIN

Wenn JA, kreuzen Sie bitte an welche (Mehrfachnennung möglich):

- Röntgen  Arthroskopie  
 Computertomographie CT  Ultraschalluntersuchung Gelenke  
 Kernspintomographie MRT  Ultraschalluntersuchung andere \_\_\_\_\_  
 Knochendichtemessung  Sonstiges \_\_\_\_\_

20. REHABILITATION / KURAUENTHALTE

**Hatten Sie aufgrund Ihrer chronischen Polyarthritits seit Ihrer letzten Visite Rehabilitations- oder Kuraufenthalte?**

- JA  NEIN

**Wenn JA**, wie viele Tage insgesamt: \_\_\_\_\_ Tage

wie viele Kosten fielen für Sie an (Selbstbehalt) \_\_\_\_\_ €

**21. AMBULUANTE BEHANDLUNG (Krankenhausambulanzen)**

**Wurden Sie seit Ihrer letzten Visite aufgrund Ihrer chronischen Polyarthritits ambulant in einem Krankenhaus behandelt?**

- JA  NEIN

**Wenn JA**, kreuzen Sie bitte an, in welcher Ambulanz Sie waren (Mehrfachnennung möglich) und geben Sie bitte an wie oft:

- Rheumaambulanz \_\_\_\_\_ mal  
 Orthopädische Ambulanz \_\_\_\_\_ mal  
 Augenambulanz \_\_\_\_\_ mal  
 Hautambulanz \_\_\_\_\_ mal  
 Gefäßambulanz \_\_\_\_\_ mal  
 Sonstiges \_\_\_\_\_ mal

**22. ARZTBESUCHE (niedergelassener Bereich)**

**Waren Sie seit Ihrer letzten Visite aufgrund Ihrer chronischen Polyarthritits in der Ordination eines Arztes in Behandlung?**

- JA  NEIN

**Wenn JA**, kreuzen Sie bitte an, bei wem Sie waren (Mehrfachnennung möglich) und geben Sie bitte an wie oft:

- |                                                     |                                              |
|-----------------------------------------------------|----------------------------------------------|
| <input type="checkbox"/> Praktischer Arzt _____ mal | <input type="checkbox"/> Augenarzt _____ mal |
| <input type="checkbox"/> Rheumatologe _____ mal     | <input type="checkbox"/> Internist _____ mal |
| <input type="checkbox"/> Orthopäde _____ mal        | <input type="checkbox"/> sonstige _____ mal  |

**23. WEITERE SPEZIALISTEN**

**Wurden seit Ihrer letzten Visite *aufgrund Ihrer chronischen Polyarthrit* nicht-medikamentöse oder spezielle Behandlungen (z.B. Physiotherapie) durchgeführt?**

- JA  NEIN

**Wenn JA**, kreuzen Sie bitte an, welche durchgeführt wurden (Mehrfachnennung möglich) und geben Sie bitte an wie oft diese durchgeführt wurden. Geben Sie bitte auch durch Ankreuzen an ob Ihre Krankenkasse (KK) dafür aufkam, bzw. nennen Sie uns bitte den ungefähren Betrag, den Sie selbst bezahlen mussten:

- Ergotherapie \_\_\_\_ mal
  - KK bezahlt  Selbst bezahlt € \_\_\_\_\_
- Physiotherapie (z.B. Heilgymnastik) \_\_\_\_ mal
  - KK bezahlt  Selbst bezahlt € \_\_\_\_\_
- Physikalische Therapie (z.B. Strom-, Ultraschalltherapie) \_\_\_\_ mal
  - KK bezahlt  Selbst bezahlt € \_\_\_\_\_
- Akupunktur \_\_\_\_ mal
  - KK bezahlt  Selbst bezahlt € \_\_\_\_\_
- Chiropraktiker \_\_\_\_ mal
  - KK bezahlt  Selbst bezahlt € \_\_\_\_\_
- Massagen \_\_\_\_ mal
  - KK bezahlt  Selbst bezahlt € \_\_\_\_\_
- Psychotherapie \_\_\_\_ mal
  - KK bezahlt  Selbst bezahlt € \_\_\_\_\_
- Homöopath \_\_\_\_ mal
  - KK bezahlt  Selbst bezahlt € \_\_\_\_\_
- Sonstige \_\_\_\_\_ mal
  - KK bezahlt  Selbst bezahlt € \_\_\_\_\_

#### 24. BLUTUNTERSUCHUNGEN

**Wurden *aufgrund Ihrer chronischen Polyarthrit* seit Ihrer letzten Visite Blutuntersuchungen / Laborkontrollen abseits der oben genannten Ambulanz- oder Arztbesuche durchgeführt?**

- JA  NEIN

**Wenn JA**, geben Sie bitte an wie oft: \_\_\_\_ mal

## 25. GELENKOPERATIONEN

**Wurden aufgrund Ihrer chronischen Polyarthritis seit Ihrer letzten Visite Operationen an Gelenken durchgeführt?**

- JA  NEIN

**Wenn JA**, geben Sie bitte an welche(s) Gelenk(e) \_\_\_\_\_

## 26. BAULICHE VERÄNDERUNGEN UND HILFSMITTEL

**Sind seit Ihrer letzten Visite aufgrund Ihrer chronischen Polyarthritis bauliche oder technische Veränderungen in Ihrer häuslichen Umgebung notwendig gewesen oder mussten Sie sich andere technische Hilfsmittel zulegen?**

- JA  NEIN

**Wenn JA**, kreuzen Sie bitte an welche (Mehrfachnennung möglich):

- Bauliche Veränderungen Haus / Wohnung (Rampen, Lift,...)
- Badezimmerveränderungen wie Duschsitz, Toilettensitzerhöhung, Haltegriffe
- Technische Veränderungen am Auto
- Schienen für Hände
- Orthopädische Maßnahmen für Füße wie Schuheinlagen, Absatzerhöhung, ..
- Gehhilfen wie Stöcke, Krücken,...
- Arbeitshilfen
- Hilfsmittel zur Alltagsbewältigung wie Besteck, Dosenöffner, Griffverdickungen, Greifhilfe,...
- Sonstiges \_\_\_\_\_

Wie viel Geld haben Sie diese Maßnahmen zusammen ungefähr gekostet?

\_\_\_\_\_ €  Krankenkasse bezahlt  weiß nicht

## 27. TRANSPORTKOSTEN

**Fielen seit Ihrer letzten Visite *aufgrund der chronischen Polyarthrit*s Reise- bzw. Transportkosten an (z. B Anreise zu Arztbesuchen, Ambulanzvisiten, Therapiestunden, etc.)?**

JA

NEIN

Anreise mit Krankentransport (Rettung)

**Wenn JA:**

a. Wenn das Auto verwendet wurde, bitte schätzen Sie, wie viele Kilometer Sie insgesamt dafür aufbrachten.

\_\_\_\_\_ km

weiß nicht

b. Wenn Sie Taxi, Bus, Zug oder sonstiges verwendet haben, bitte schätzen Sie, wie viele Kosten für Sie insgesamt anfielen.

€ \_\_\_\_\_

weiß nicht

## 28. HEIMHILFE

**Benötigten Sie seit Ihrer letzten Visite *aufgrund der chronischen Polyarthrit*s irgendwelche Art von Pflege oder Heimhilfe?**

JA

NEIN

**Wenn JA**, kreuzen Sie bitte an welche Art von Pflege / Heimhilfe benötigt wurde (Mehrfachnennung möglich):

Pflege von Familienangehörigen / Freunden

Pflege durch professionelle Heimhilfen / mobile Krankenpflege

Putzfrau, Haushaltshilfe

andere \_\_\_\_\_

a. Wenn Sie Pflege oder Hilfe von Familienangehörigen / Freunden oder anderen erhalten haben, wie viele Stunden pro Woche wurde dafür aufgewendet?

\_\_\_\_\_ h/Woche

weiß nicht

b. Wenn Sie Pflege / Hilfe durch eine professionelle Heimhilfe, mobile Krankenpflege oder Putzfrau bekommen, wie viel Kosten pro Woche fallen dadurch für Sie an?

\_\_\_\_\_ €/Woche

weiß nicht
